# Supplementary material for: Multi-Fold Enhancement of Tocopherol Yields Employing High CO2 Supplementation and Nitrate Limitation in Native Isolate Monoraphidium sp.
Source: MDPI journal article supplement (doi:10.3390/cells11081315), 2022-04-13
Supplement: s1 [file s1]

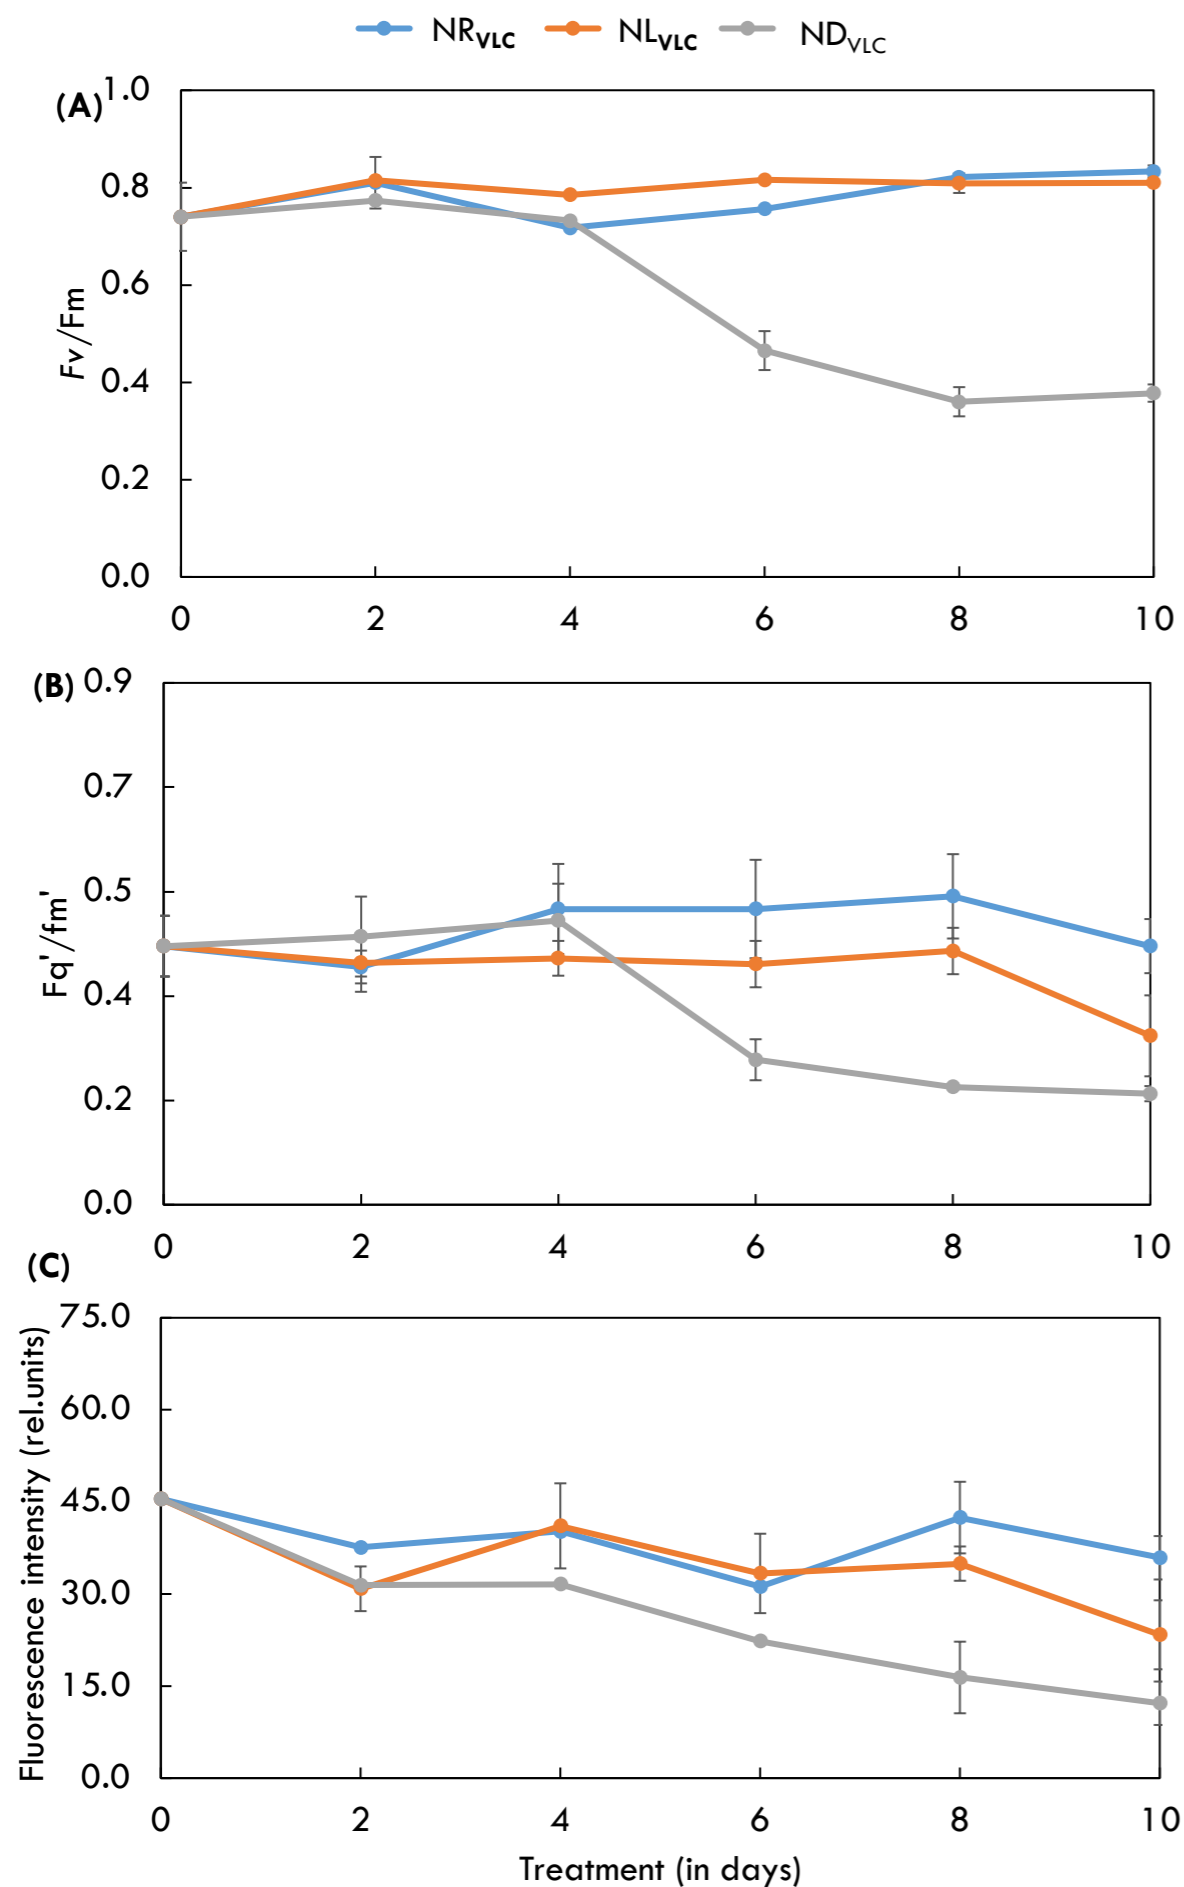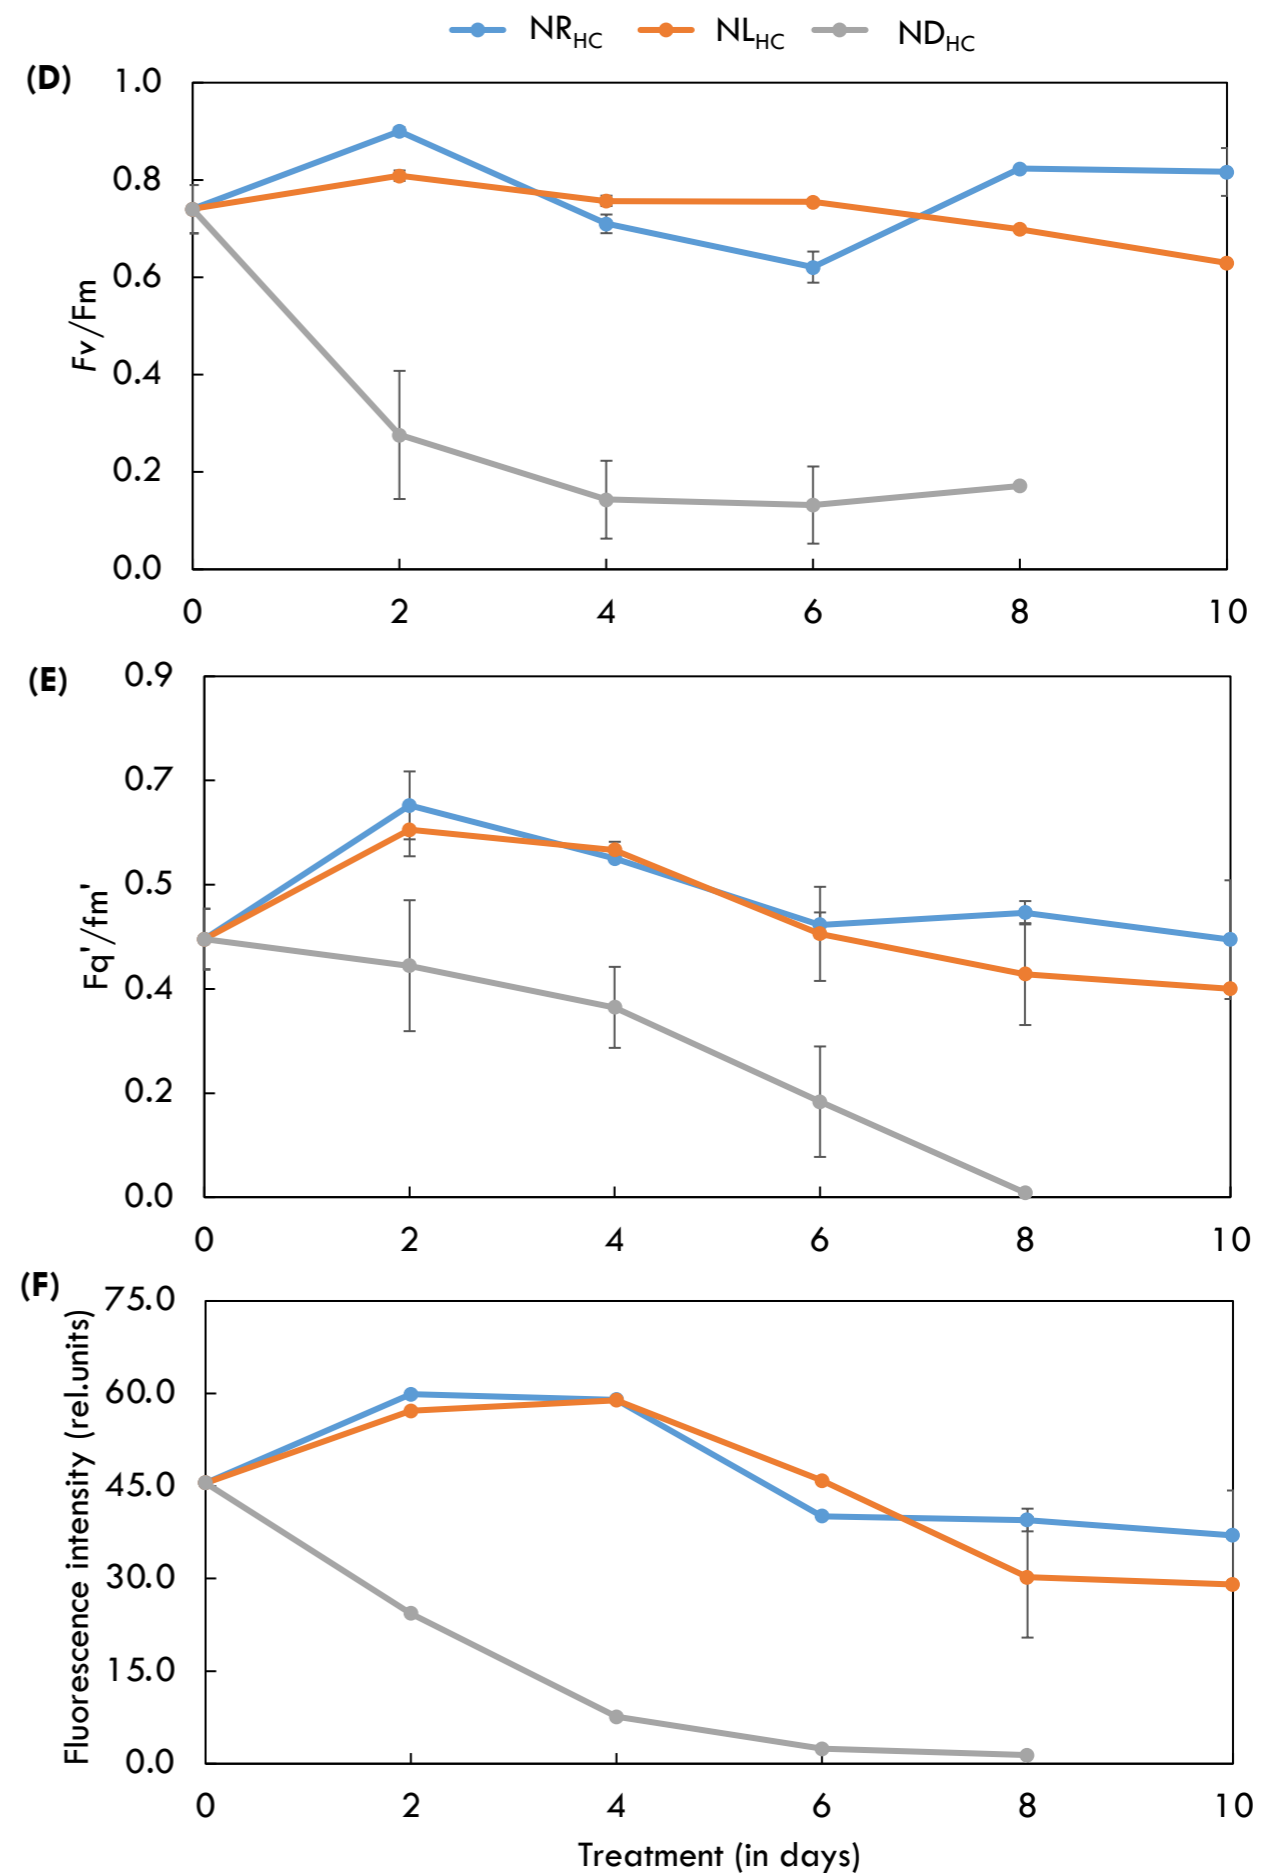

**Figure S1: (A & D)** Line diagram indicating maximum quantum yields of the PSII efficiency ( $F_v/F_m$ ) in *Monoraphidium* sp. CABeR41 subjected to NR<sub>VLC</sub>, NL<sub>VLC</sub>, ND<sub>VLC</sub>, NR<sub>HC</sub>, NL<sub>HC</sub> and ND<sub>HC</sub> conditions; **(B & E)** Line diagram indicating PSII operating efficiency i.e., the Fq'/Fm' ratio; **(C & F)** Changes in electron transport rate (ETR) of the PSII reaction centres

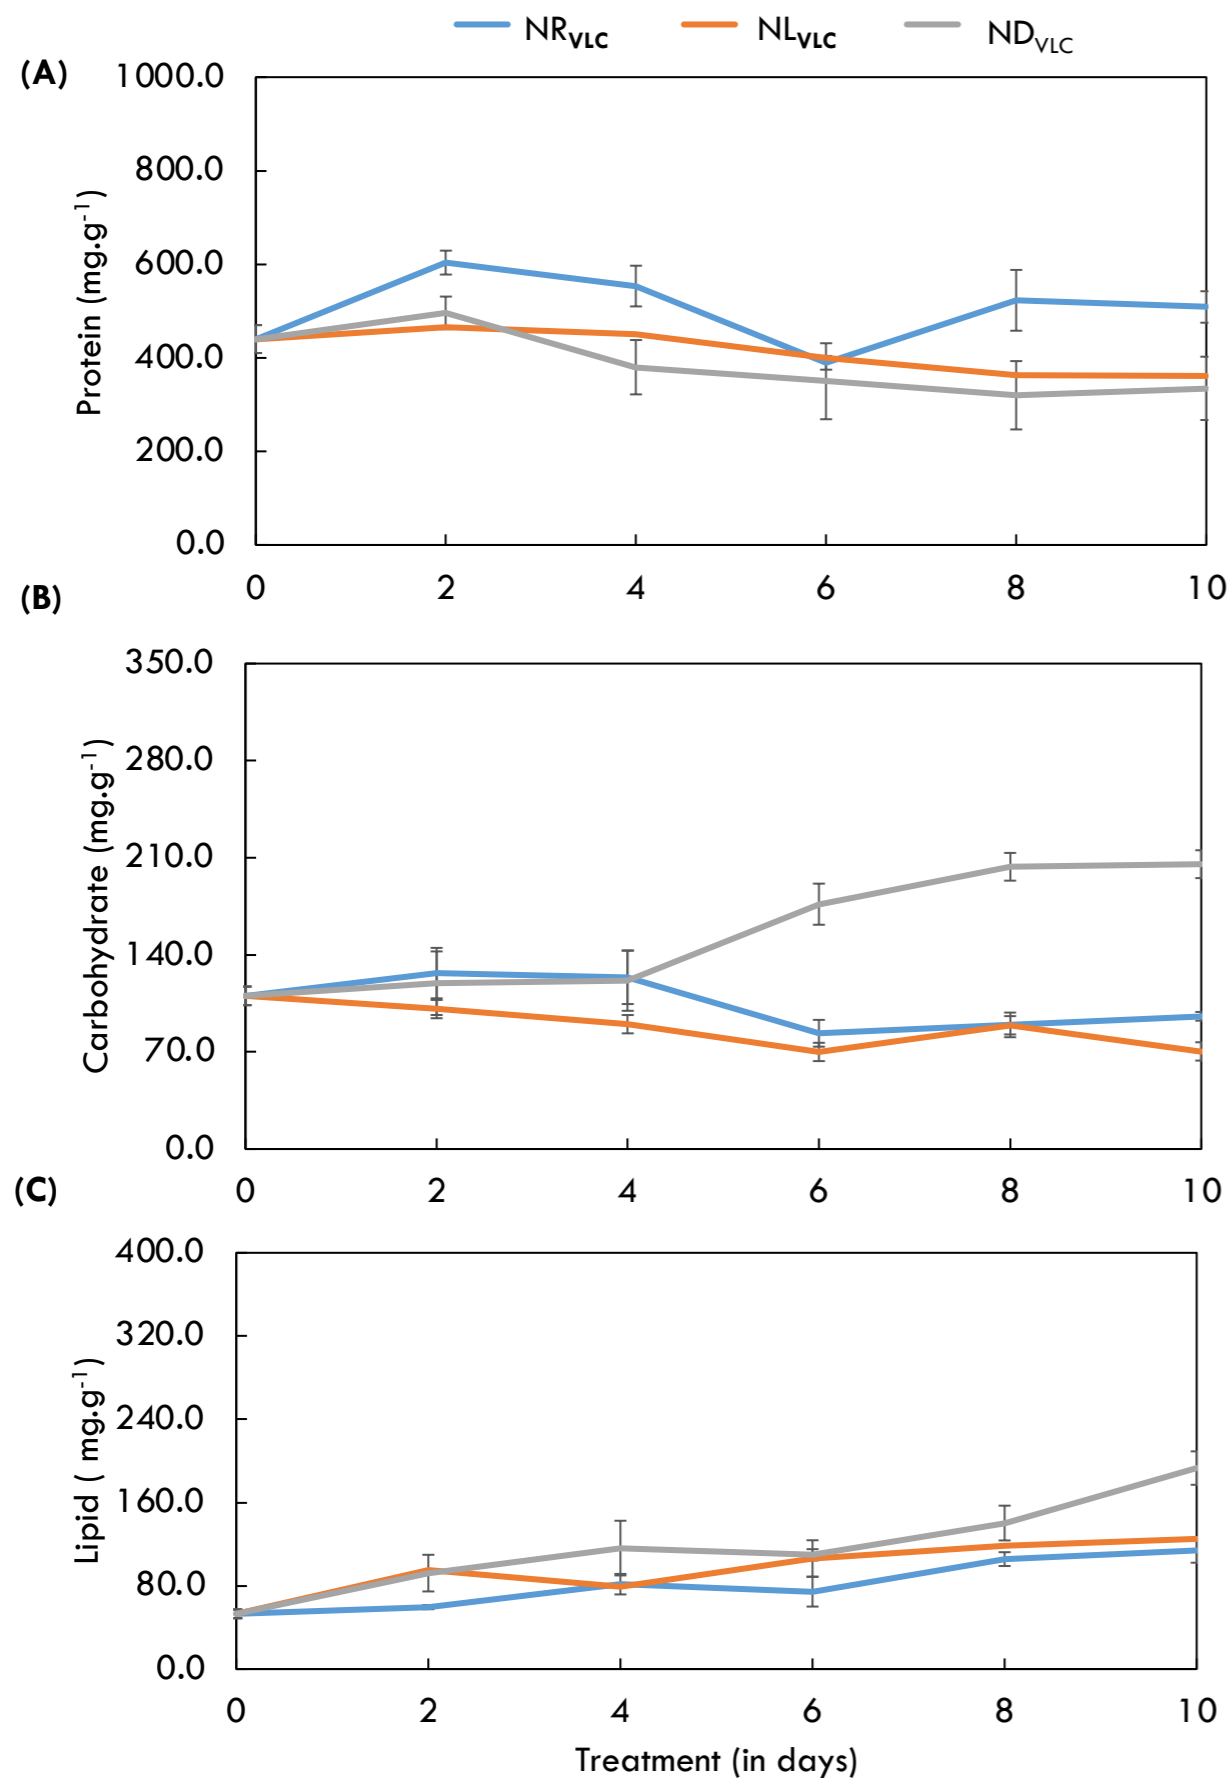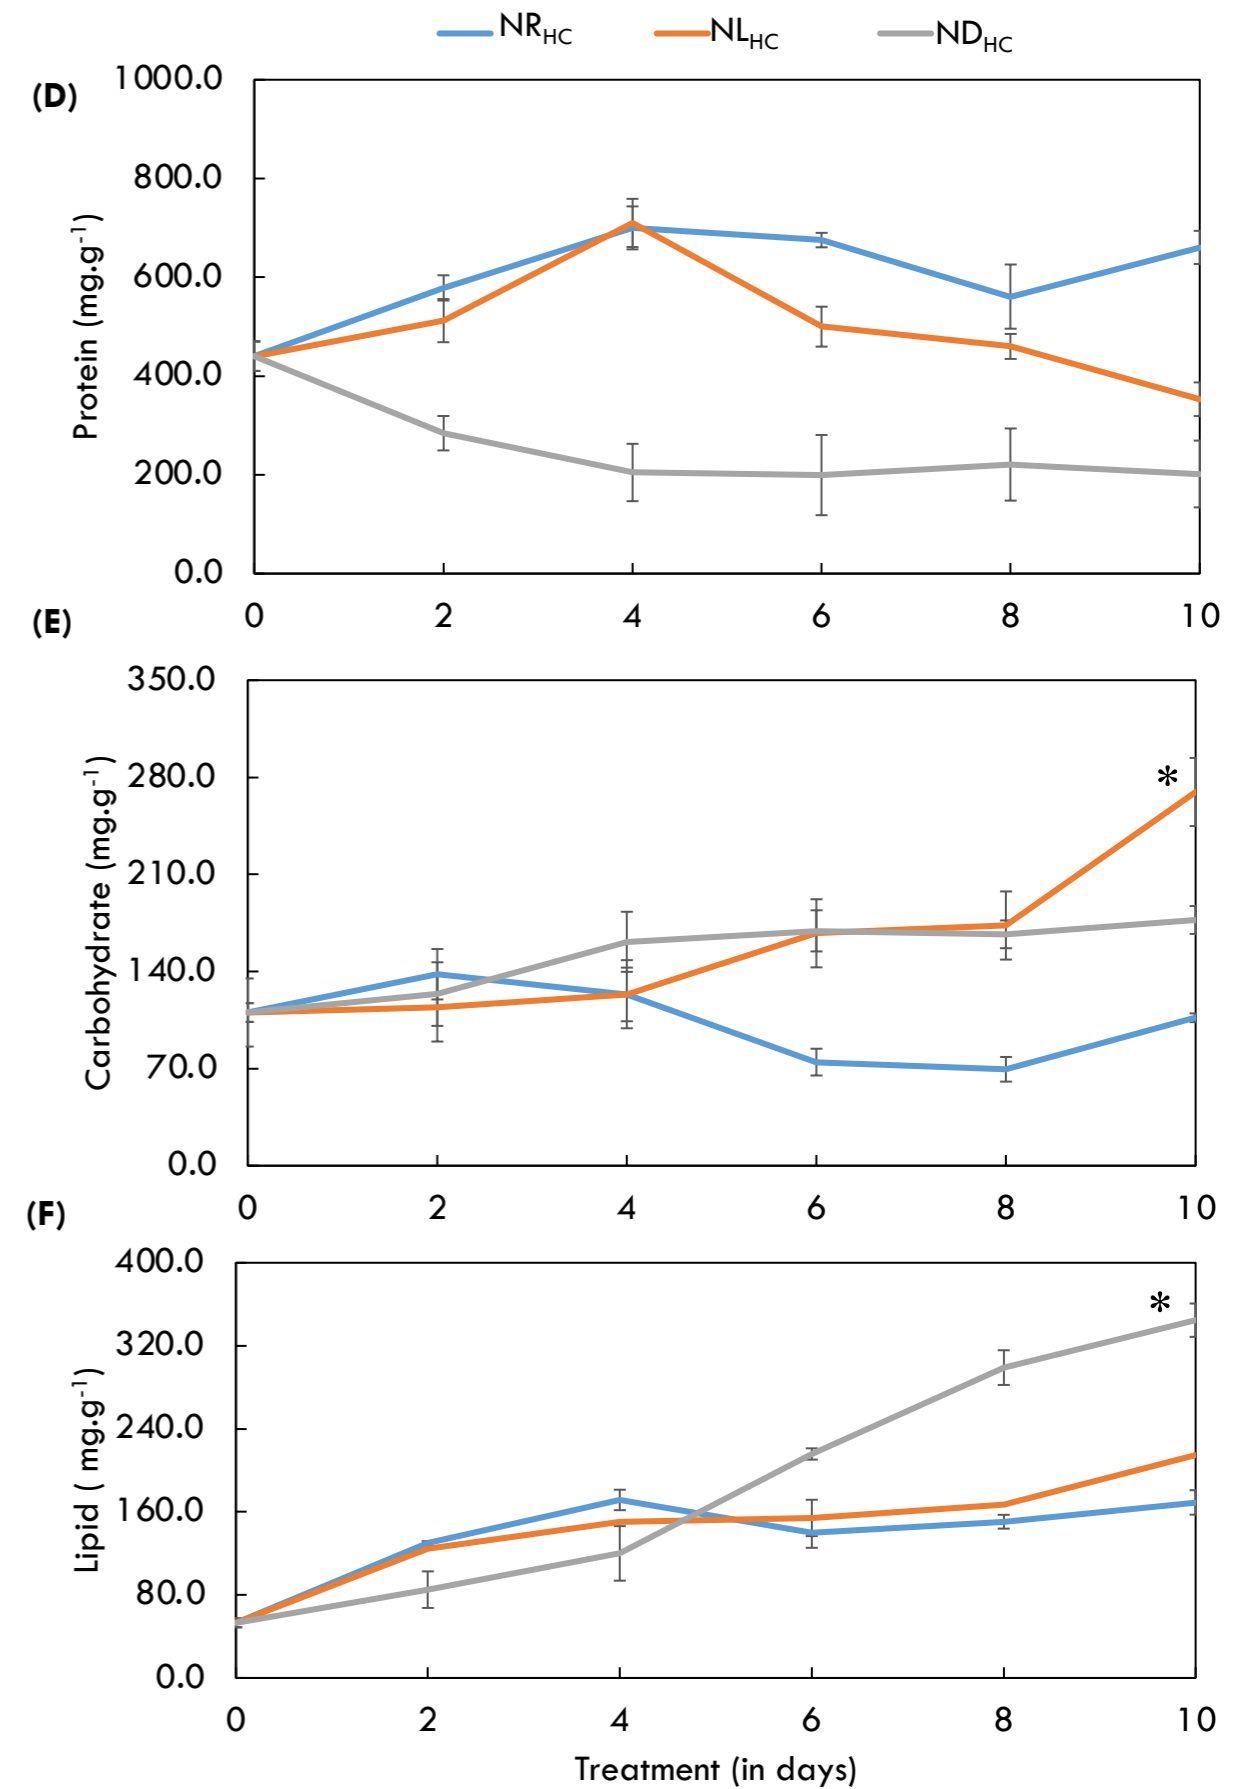

**Figure S2:** Biochemical profiles of native isolate *Monoraphidium* sp. CABer41 subjected to NR<sub>VLC</sub>, NL<sub>VLC</sub>, ND<sub>VLC</sub>, NR<sub>HC</sub>, NL<sub>HC</sub>, and ND<sub>HC</sub> conditions in mg.g<sup>-1</sup>, (A & D) total proteins; (B & E) total carbohydrates; and (C & F) total lipids (\*statistical significance by one-way ANOVA,  $P < 0.05$ )

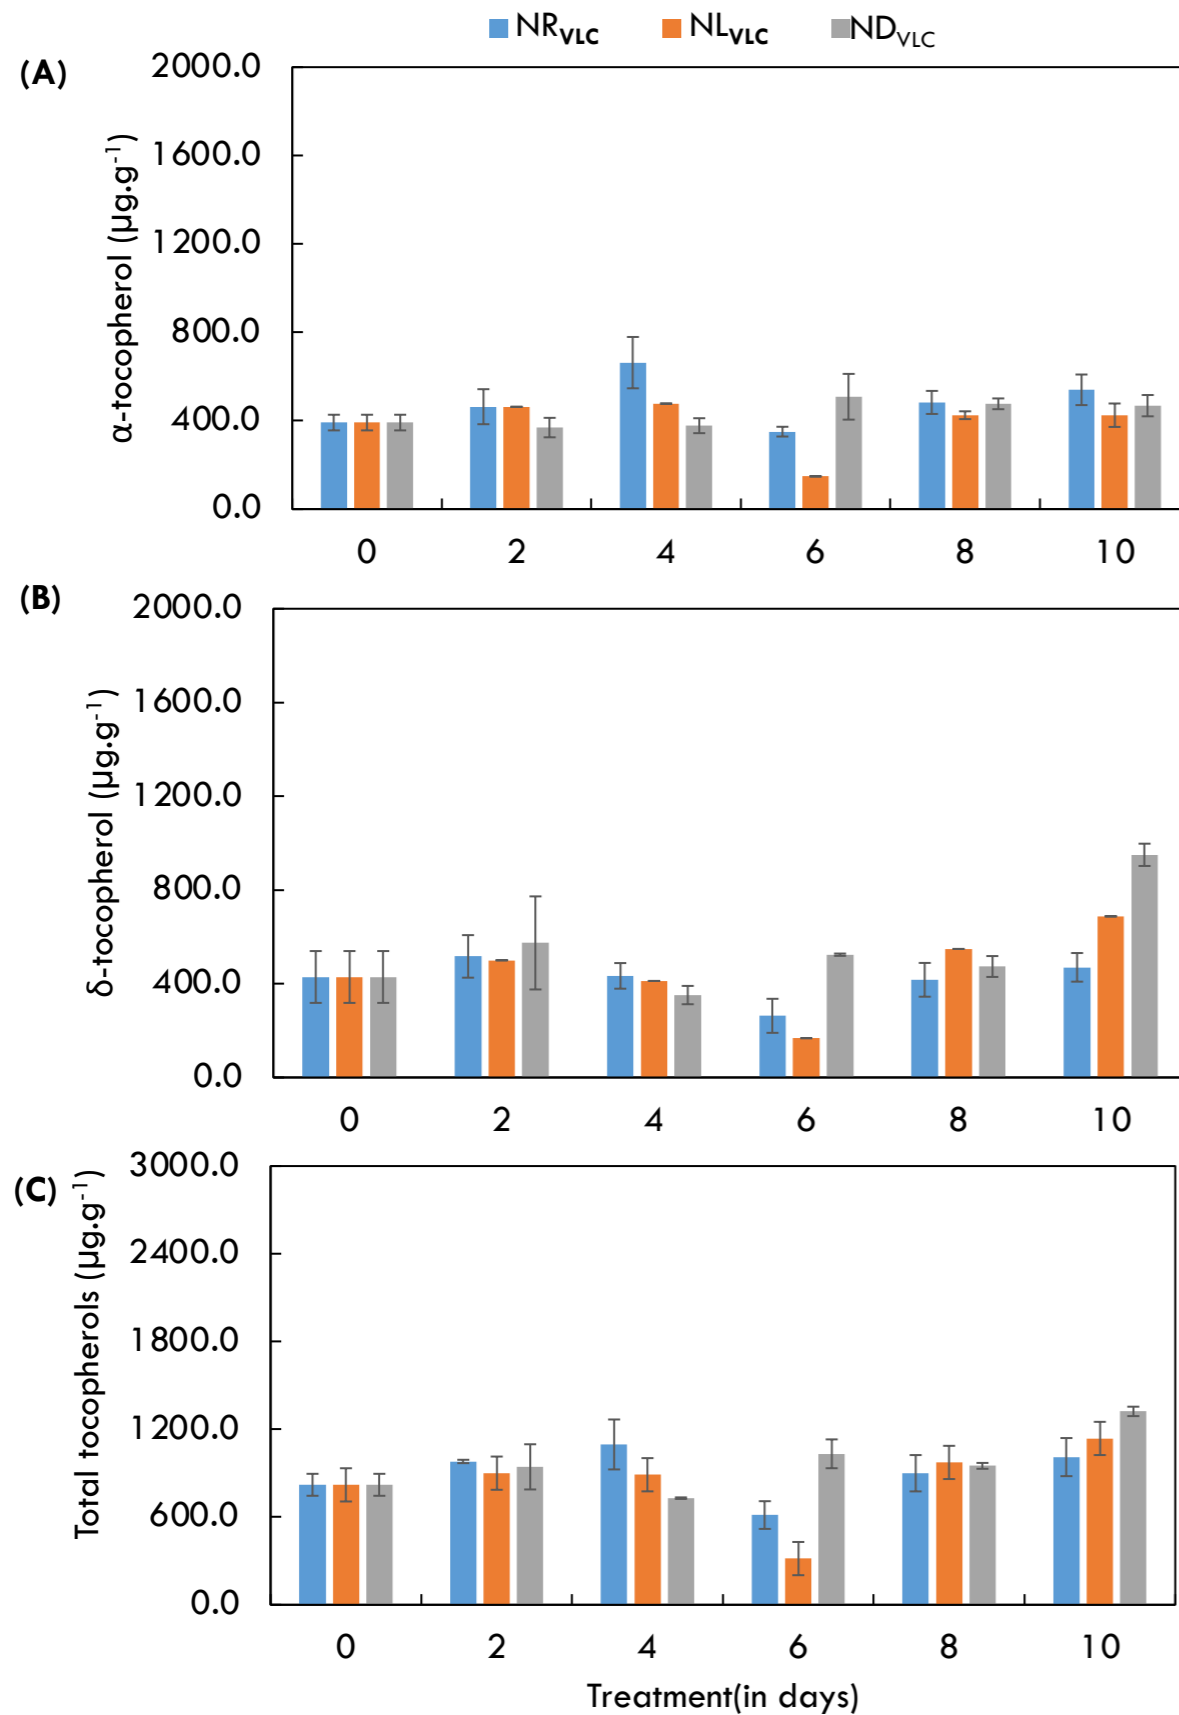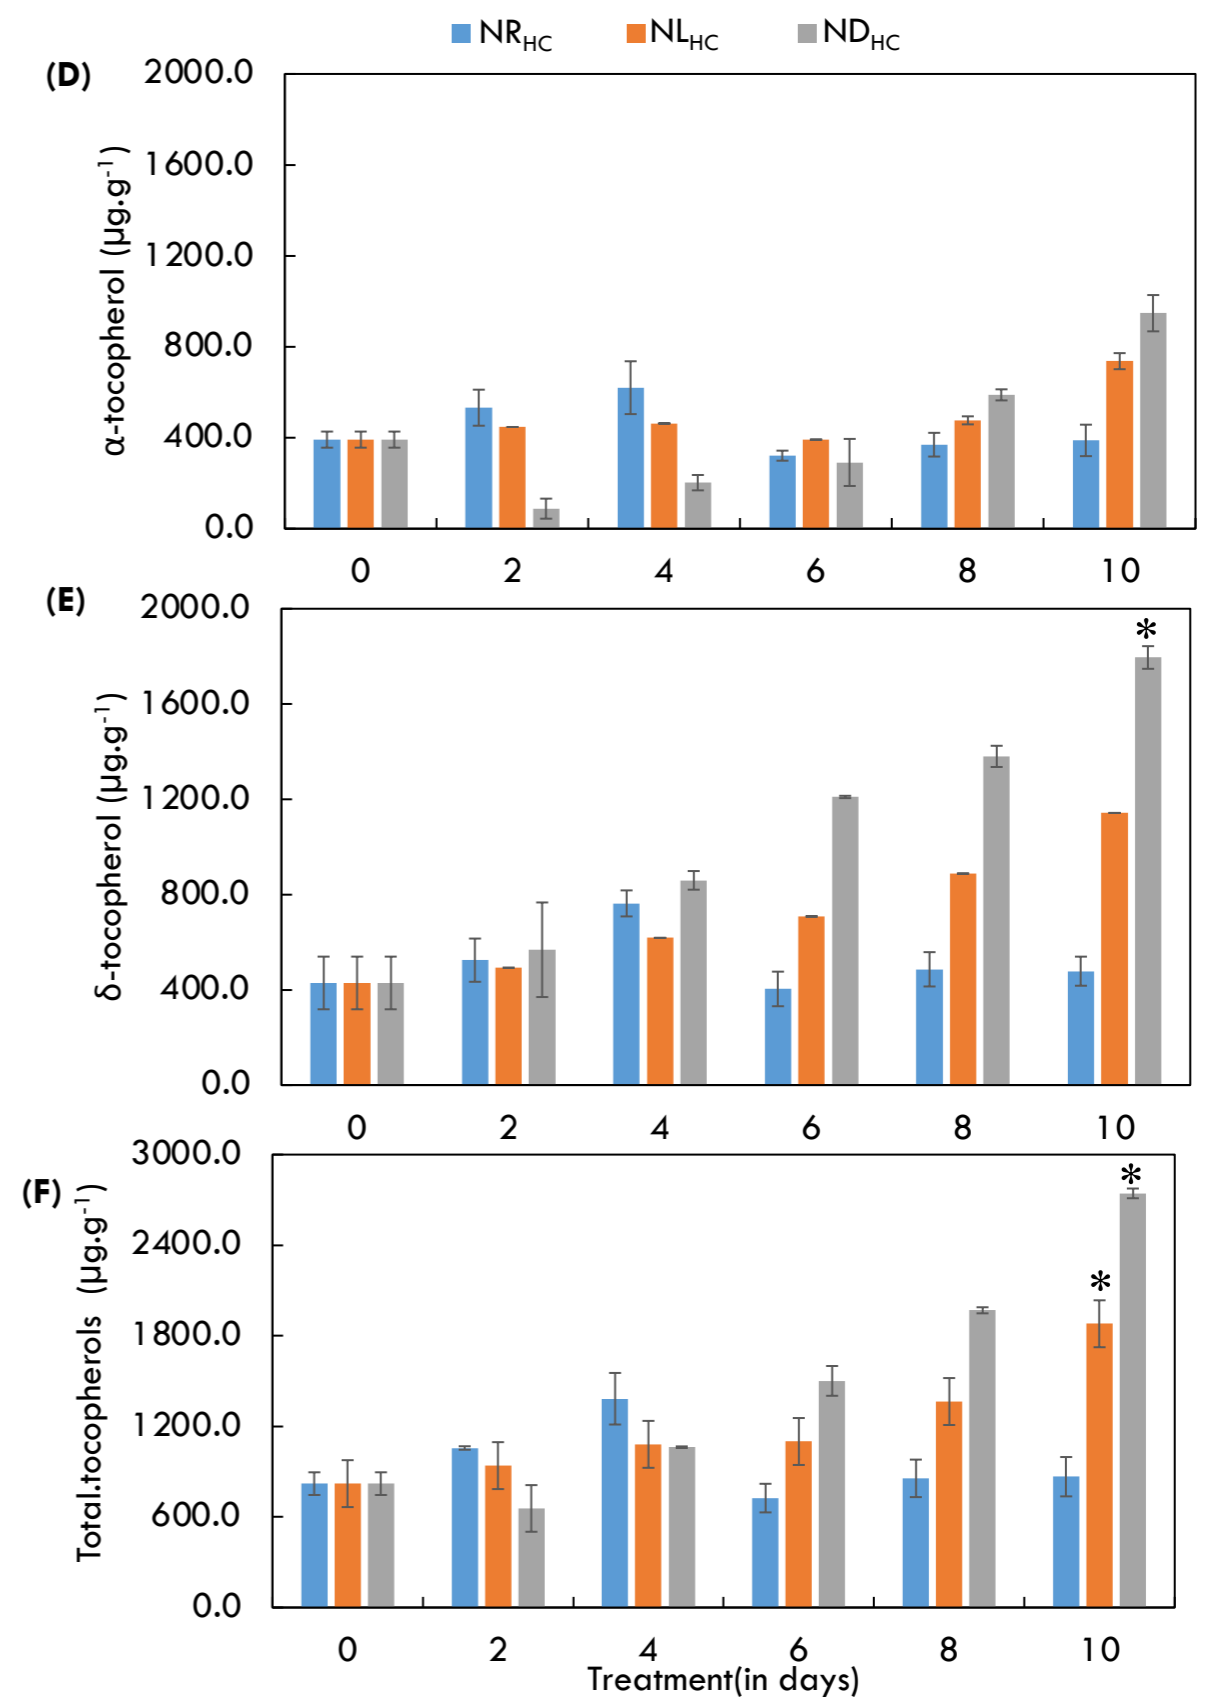

**Figure S3:** Quantitative analysis of tocopherols (in  $\text{mg}\cdot\text{g}^{-1}$ ) of the indigenous strain *Monoraphidium* subjected to NR<sub>VLC</sub>, NL<sub>VLC</sub>, ND<sub>VLC</sub>, NR<sub>HC</sub>, NL<sub>HC</sub> and ND<sub>HC</sub> conditions (A & D)  $\alpha$ -tocopherol; (B & E)  $\delta$ -tocopherol; and (C & F) total tocopherols (\*statistical significance by one-way ANOVA,  $P < 0.05$ )

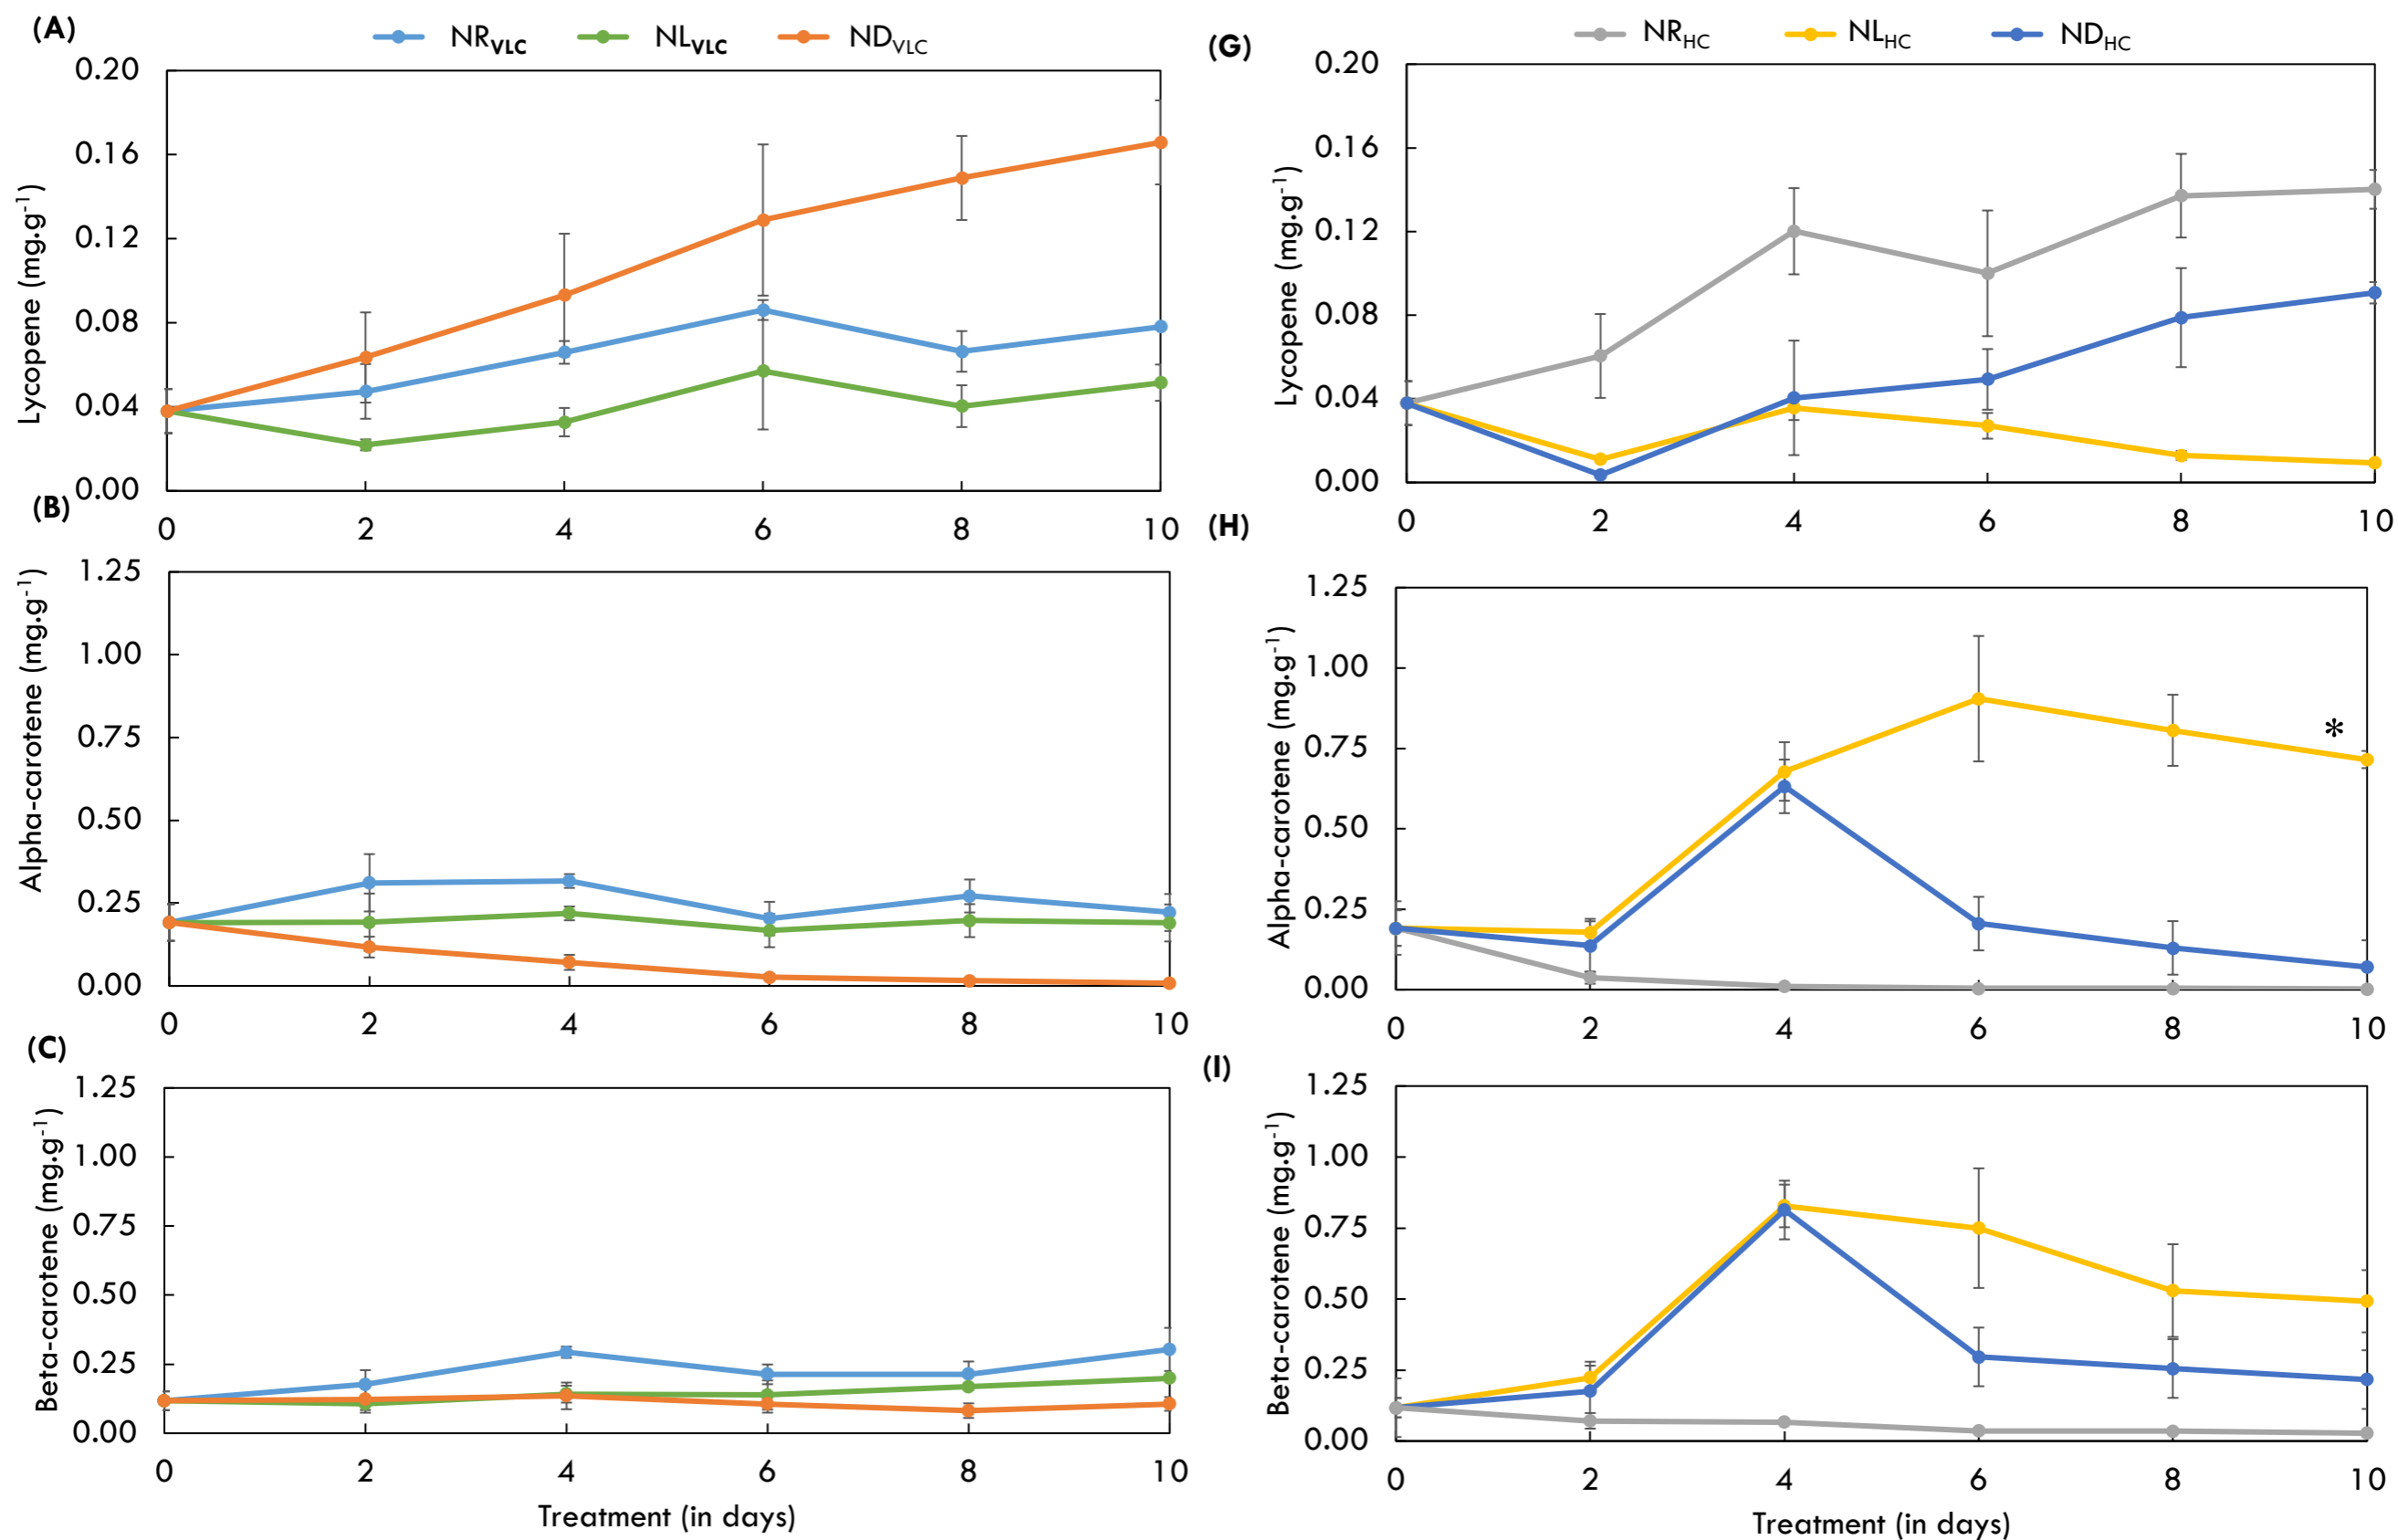

**Figure S4:** Line diagram representing the time-course profiles of different carotenoids content (mg.g<sup>-1</sup> dcw) in *Monoraphidium* sp. CABer41 subjected to NR<sub>VLC</sub>, NL<sub>VLC</sub>, ND<sub>VLC</sub>, NR<sub>HC</sub>, NL<sub>HC</sub> and ND<sub>HC</sub> conditions (A & G) Lycopene; (B & H)  $\alpha$ -carotene; (C & I)  $\beta$ -carotene; (D & J) Zeaxanthin; (E & K) Violaxanthin; (F & L) Echinenone (\*statistical significance by one-way ANOVA,  $P < 0.05$ )

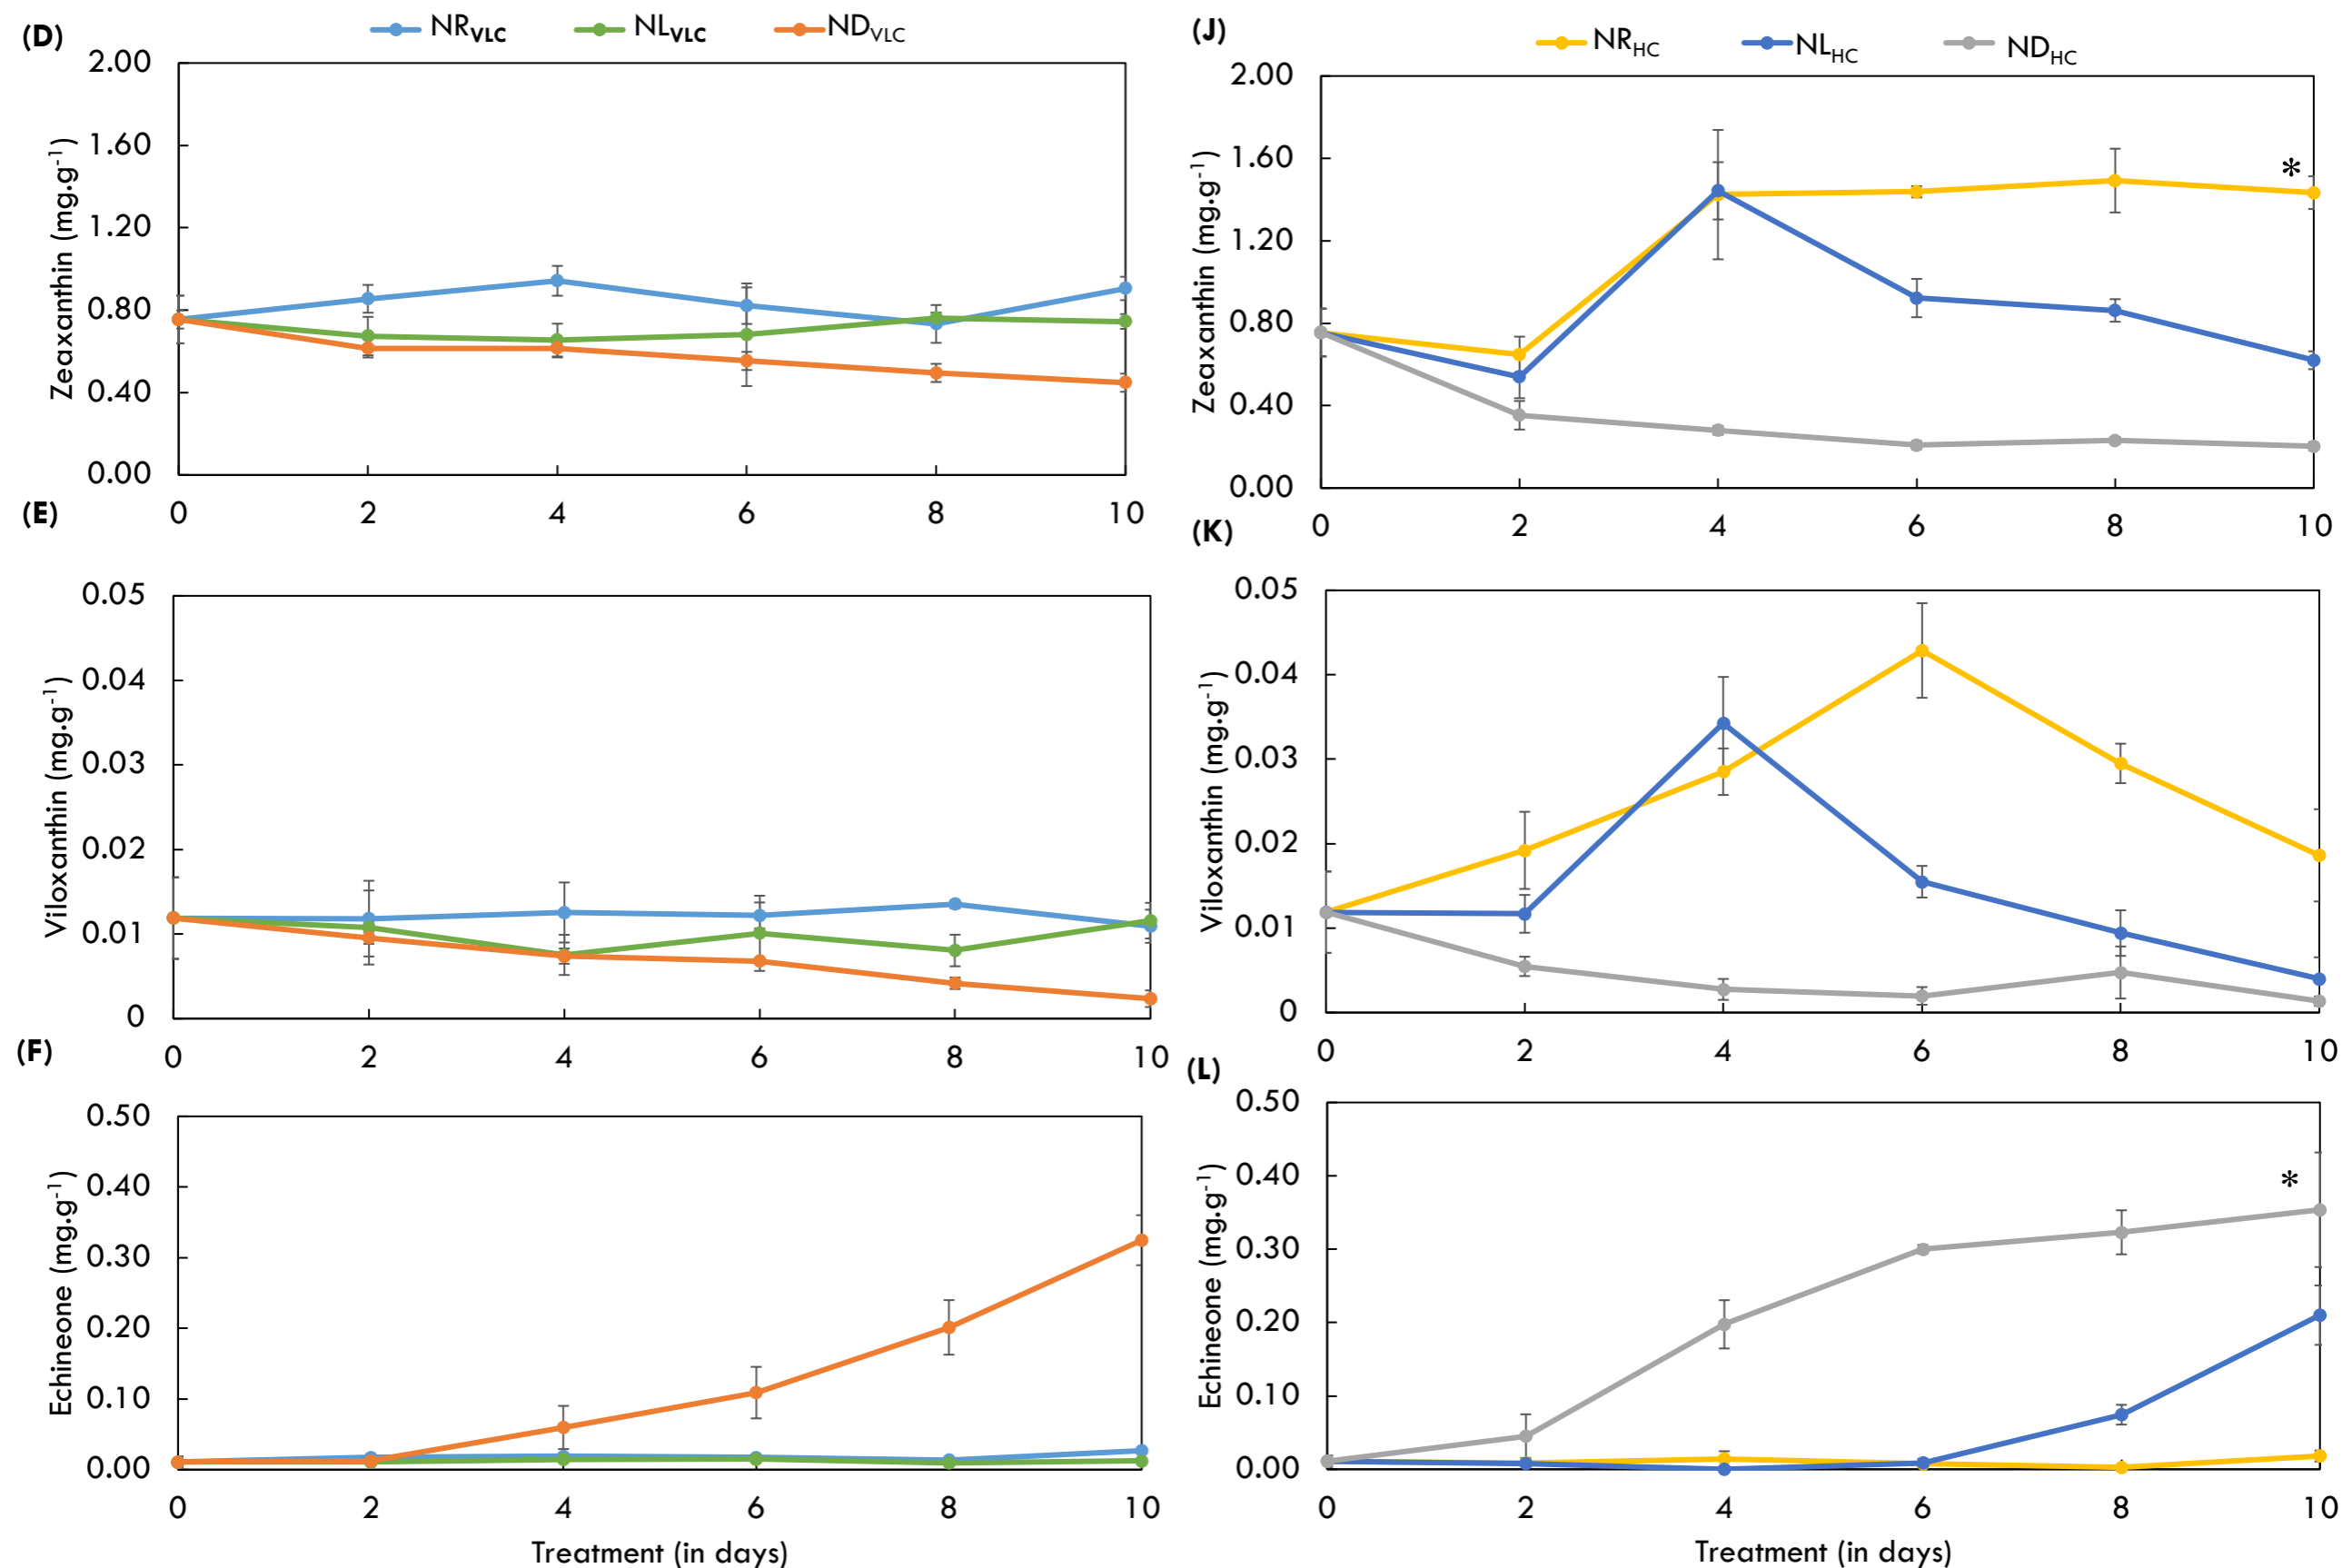

**Figure S4:** Line diagram representing the time-course profiles of different carotenoids content (mg.g<sup>-1</sup> dcw) in *Monoraphidium* sp. CABer41 subjected to NR<sub>VLC</sub>, NL<sub>VLC</sub>, ND<sub>VLC</sub>, NR<sub>HC</sub>, NL<sub>HC</sub> and ND<sub>HC</sub> conditions (A & G) Lycopene; (B & H)  $\alpha$ -carotene; (C & I)  $\beta$ -carotene; (D & J) Zeaxanthin; (E & K) Violaxanthin; (F & L) Echeneone (\*statistical significance by one-way ANOVA,  $P < 0.05$ )

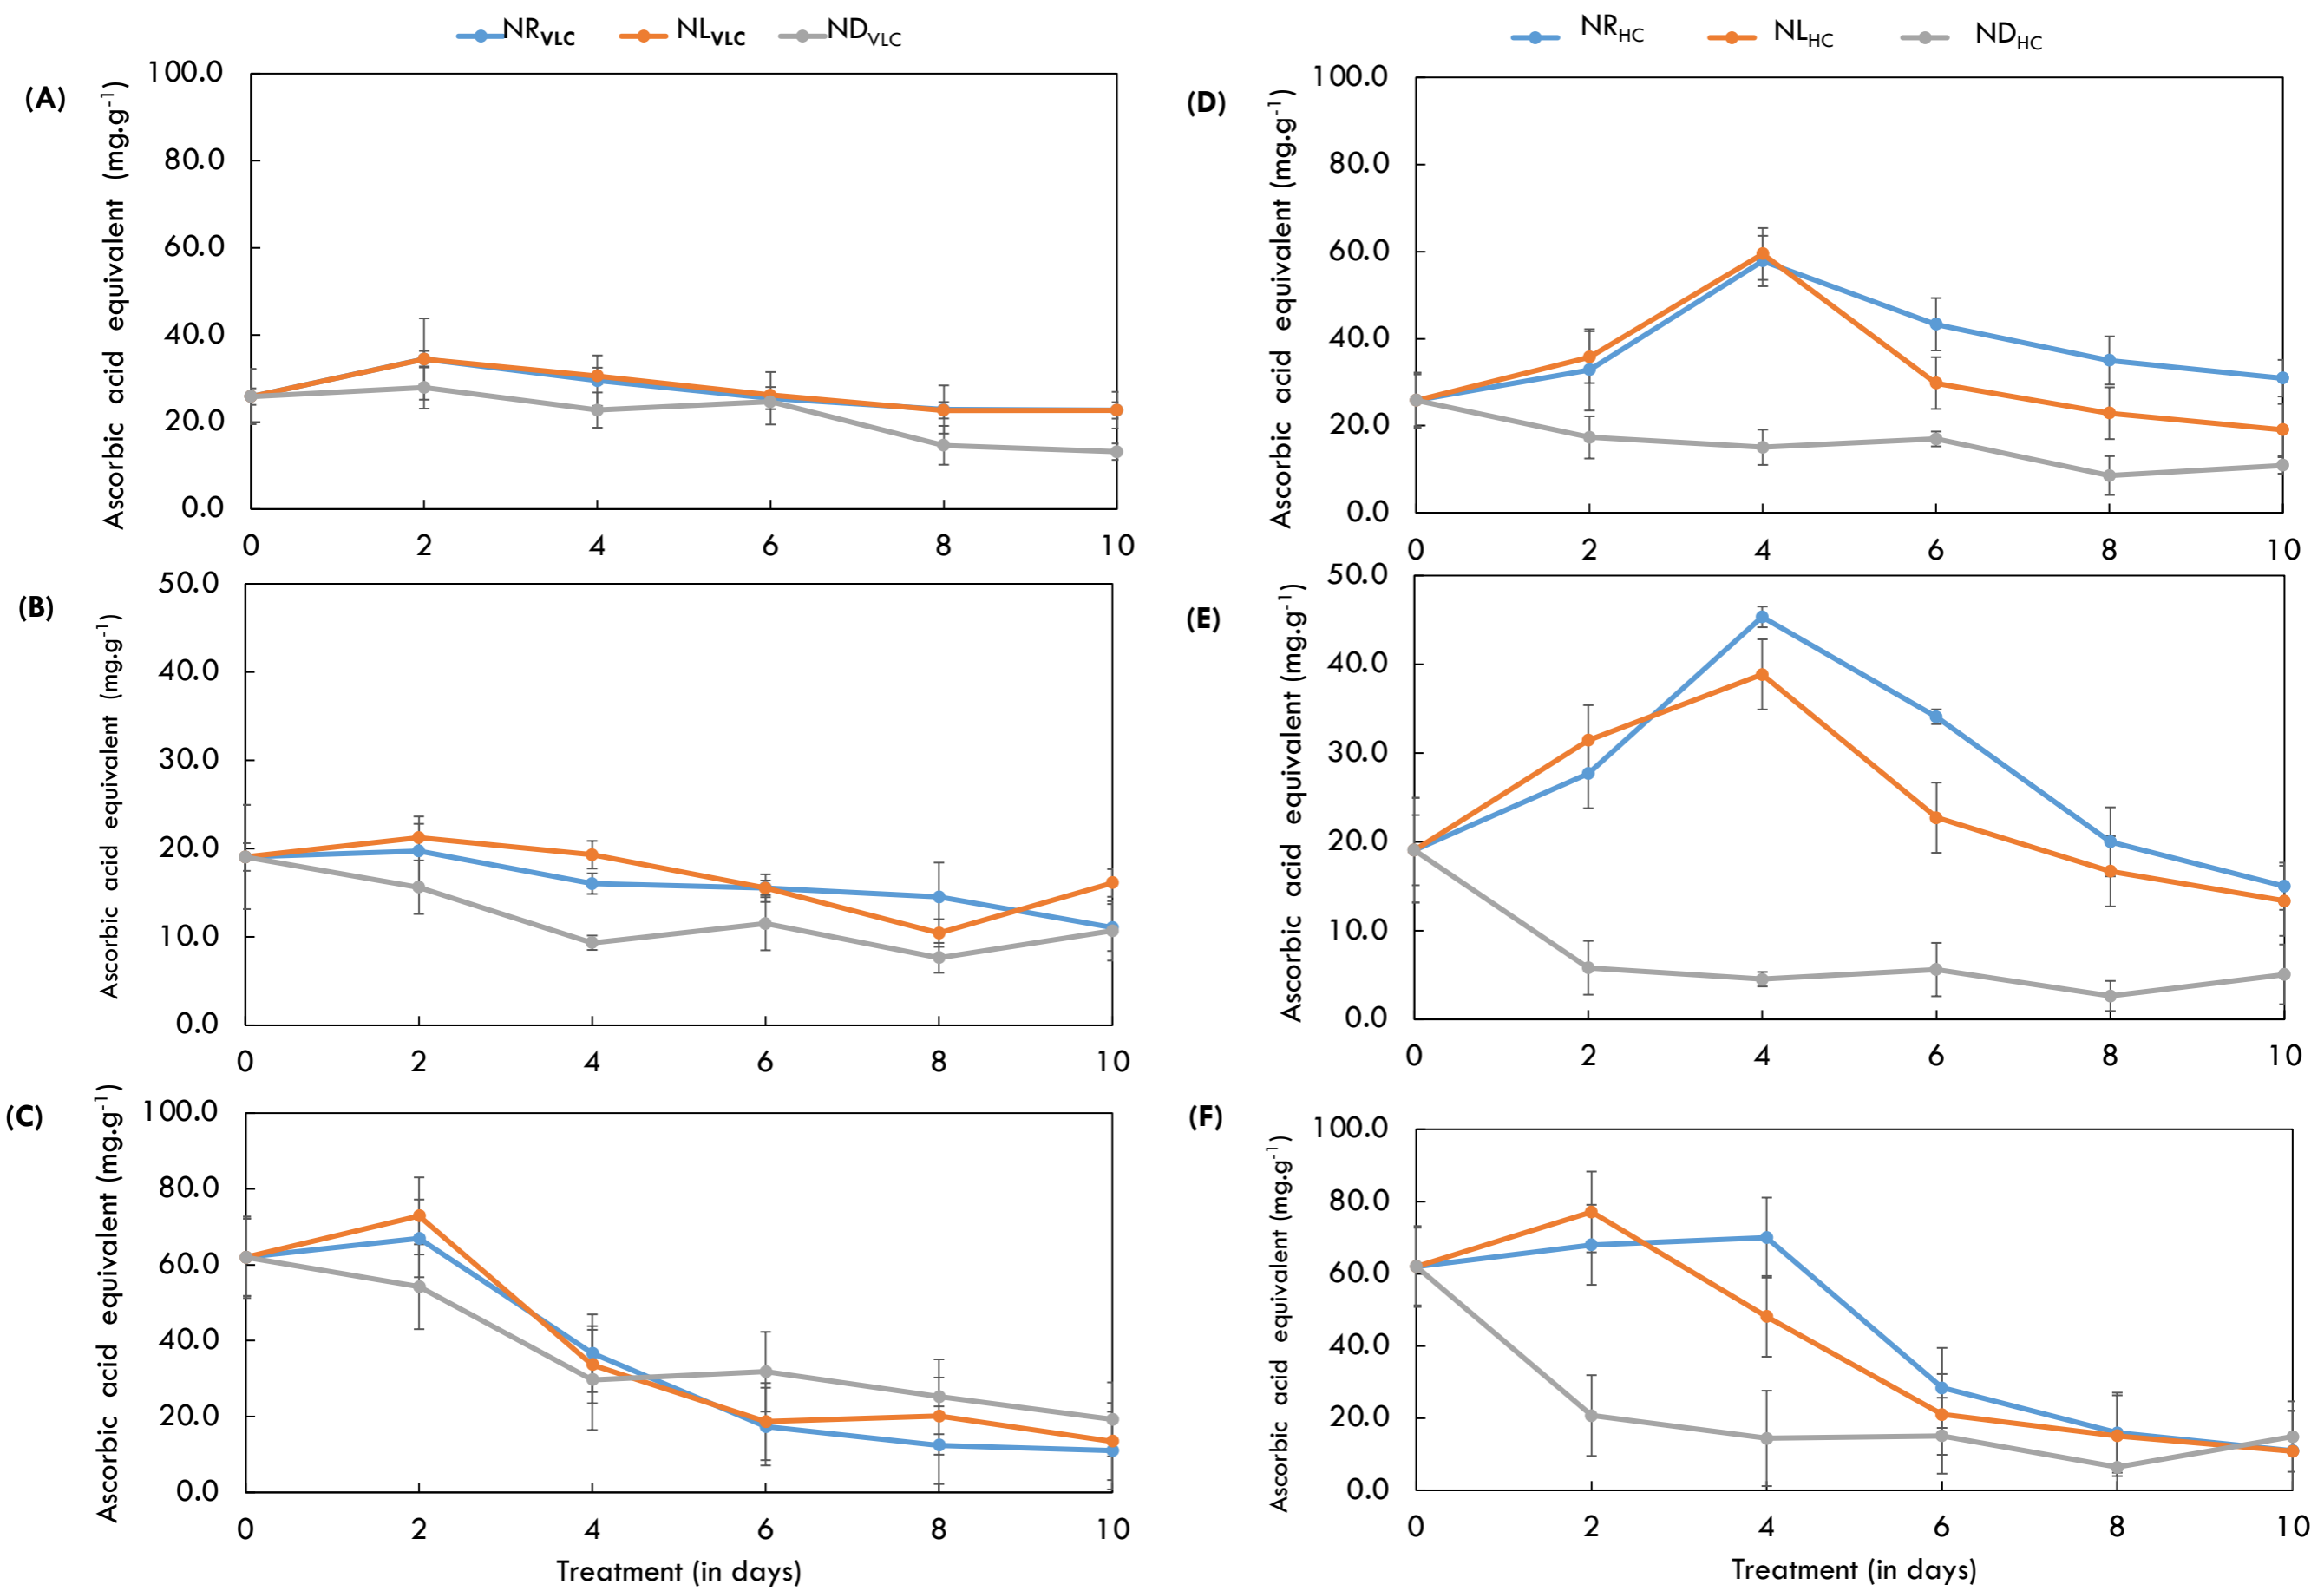

**Figure S5:** Time-course experiments demonstrating antioxidant efficiency of the microalga *Monoraphidium* sp. CABeR41 subjected to NR<sub>VLC</sub>, NL<sub>VLC</sub>, ND<sub>VLC</sub>, NR<sub>HC</sub>, NL<sub>HC</sub> and ND<sub>HC</sub> conditions (in terms of ascorbic acid equivalent mg.g<sup>-1</sup>)

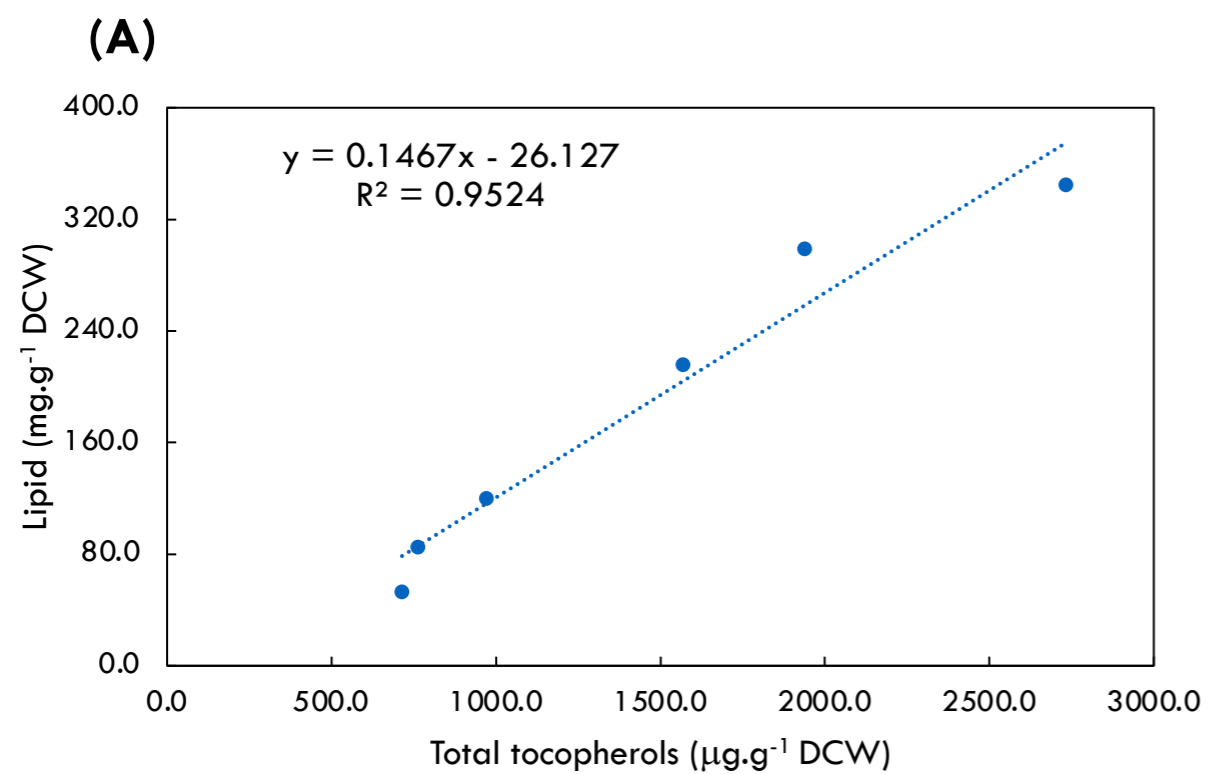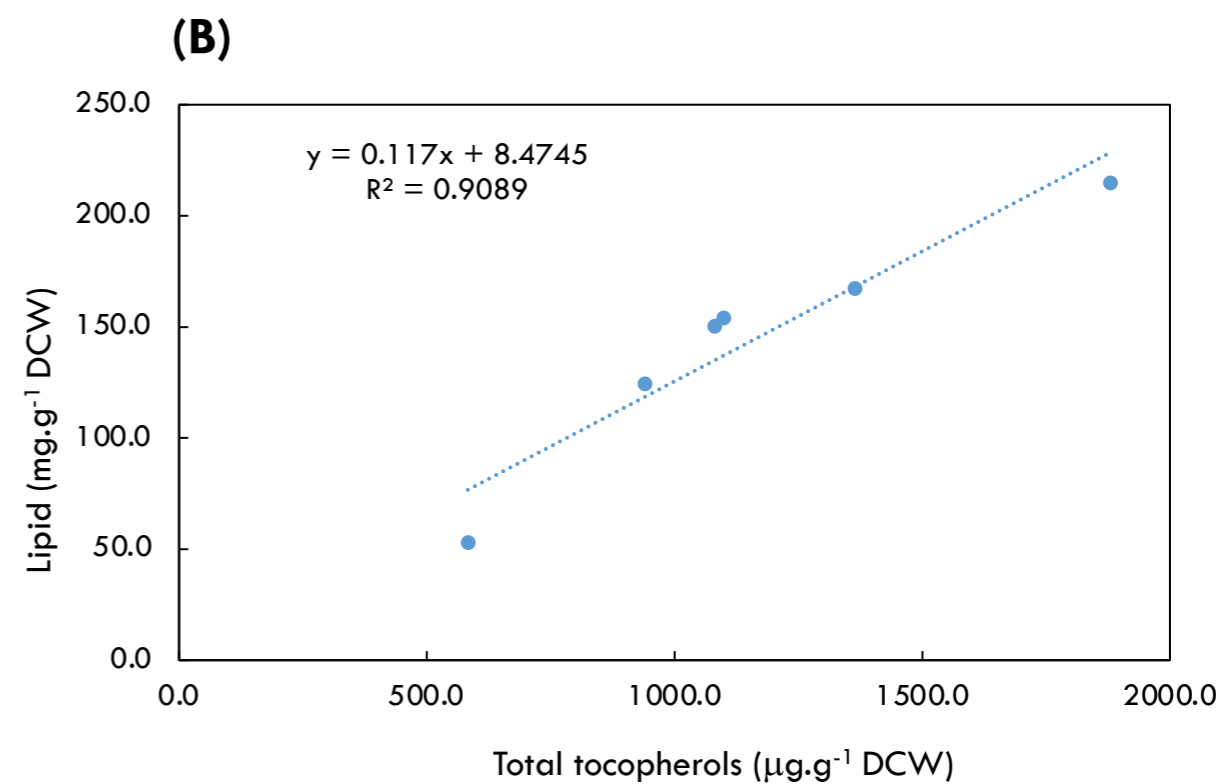

**Figure S6:** Linear regression analysis depicting the co-relation between total lipids *vs* total tocopherols in native isolate *Monoraphidium* sp. **(A)** ND<sub>HC</sub> and **(B)** NL<sub>HC</sub>.
